# Supplementary material for: The Photodynamic Anticancer and Antibacterial Activity Properties of a Series of meso-Tetraarylchlorin Dyes and Their Sn(IV) Complexes
Source: MDPI journal article supplement (doi:10.3390/molecules28104030), 2023-05-11
Supplement: s1 [file s1]

Supplementary Material

# The Photodynamic Anticancer and Antibacterial Activity Properties of a Series of *meso*-Tetraarylchlorin Dyes and Their Sn(IV) Complexes

Rodah Soy <sup>1</sup>, Balaji Babu <sup>1,2</sup>, John Mack <sup>1,\*</sup> and Tebello Nyokong <sup>1</sup>

<sup>1</sup> Institute for Nanotechnology Innovation, Rhodes University, Makhanda 6140, South Africa

<sup>2</sup> Department of Chemistry, SRM University-AP, Amaravati 522502, India

\* Correspondence: j.mack@ru.ac.za; Tel.: +27-46-603-7234

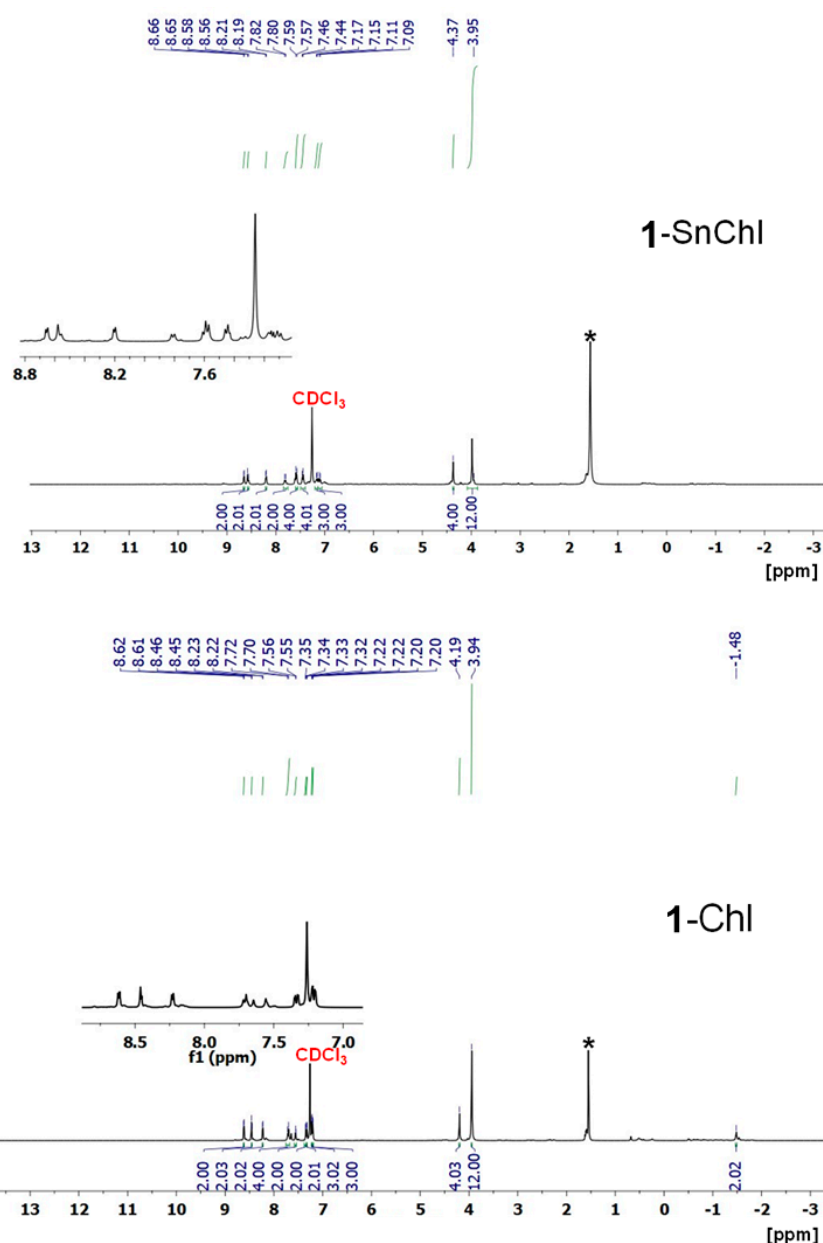

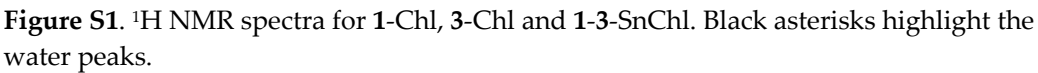

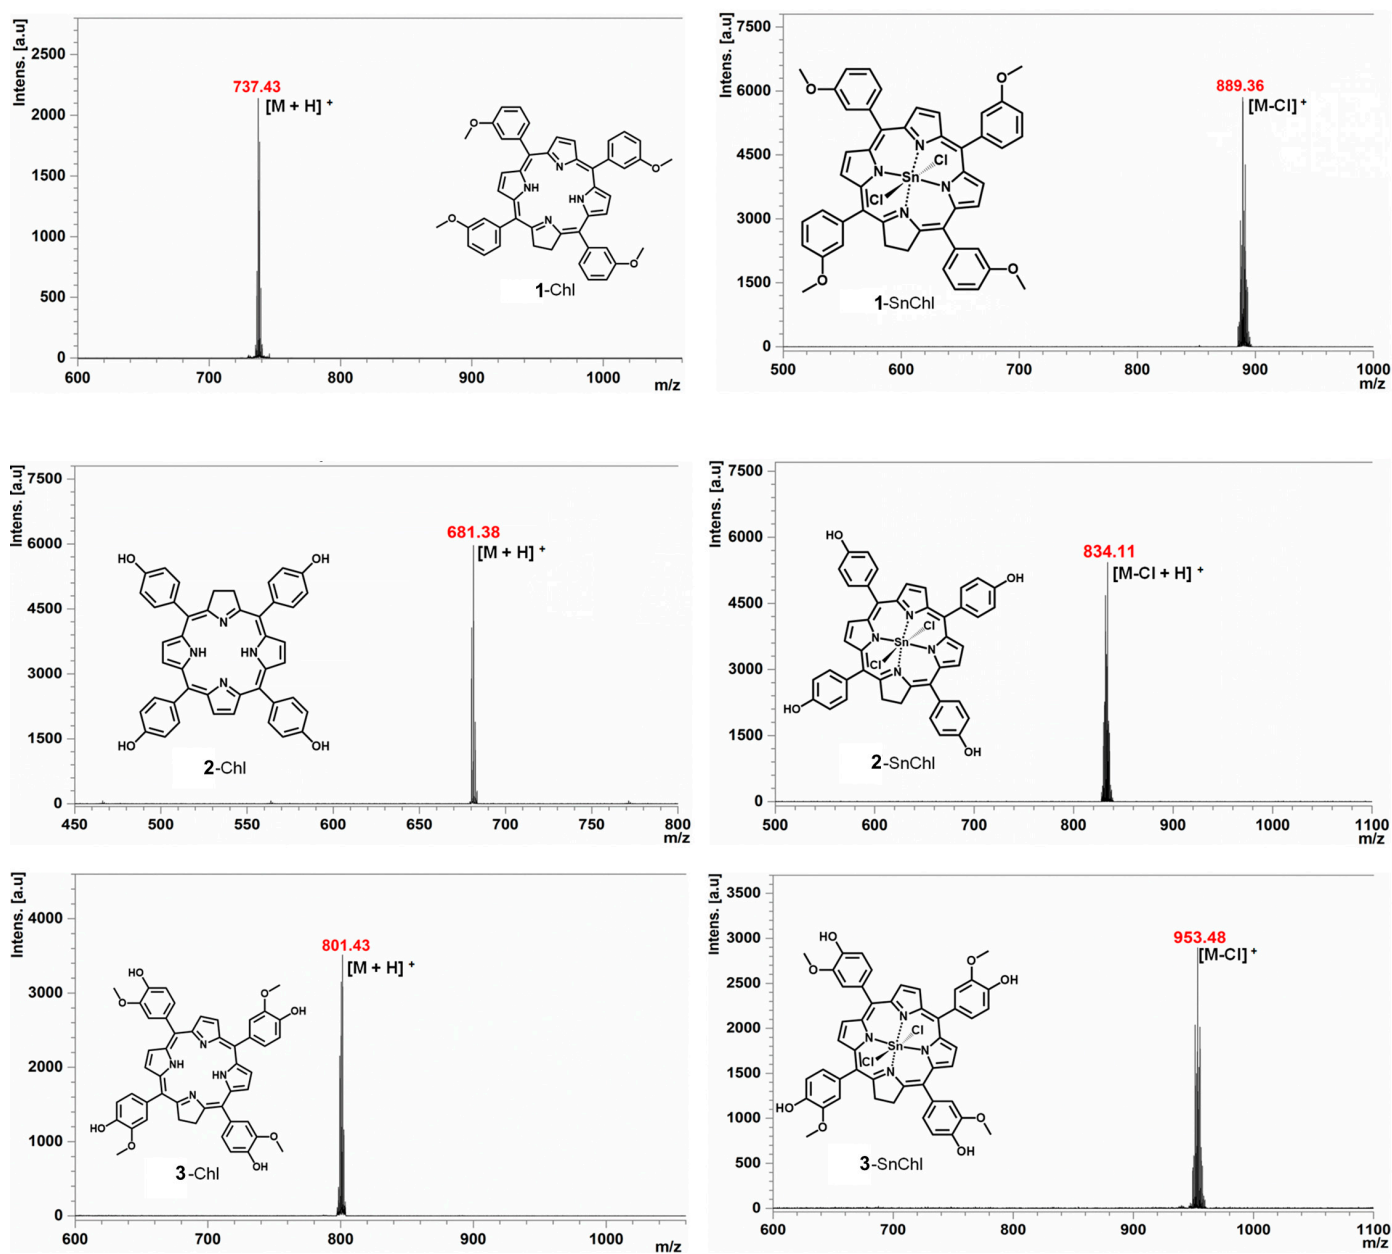

Figure S2: MALDI-TOF MS data for 1-3-Chl and 1-3-SnChl.

**Table S1.** Calculated full-width at half-maximum (FWHM) values for the B bands of 1-3-Chl and 1-3-SnChl in DMSO and 1% DMSO/H<sub>2</sub>O.

|                                                           | FWHM (nm) * |                          |
|-----------------------------------------------------------|-------------|--------------------------|
|                                                           | DMSO        | 1% DMSO/H <sub>2</sub> O |
| 1-Chl                                                     | 20.7        | 33.2                     |
| 2-Chl                                                     | 28.1        | 43.2                     |
| 3-Chl                                                     | 24.8        | 41.4                     |
| 1-SnChl                                                   | 12.3        | 20.4                     |
| 2-SnChl                                                   | 29.1        | 32.4                     |
| 3-SnChl                                                   | 41.8        | 43.2                     |
| * calculated from fitting the B band with Origin software |             |                          |
